# Supplementary material
Source: HighWire-hosted journal article supplement (https://www.jpn.ca/highwire/filestream/89437/field_highwire_adjunct_files/0/jpn-180036-1-at.pdf)
Supplement: jpn-180036-1-at.pdf [file jpn-180036-1-at.pdf]

**Appendix 1** to Hassel, S, MacQueen, G, Arnott, S et al. The Canadian Biomarker Integration Network in Depression (CAN-BIND) - Magnetic Resonance Imaging Protocols. *J Psychiatry Neurosci* 2019.

DOI: 10.1503/jpn.180036

© 2019 Joule Inc., or its licensors

*Online appendices are unedited and posted as supplied by the authors.*

| <b>Supplementary Table 1.</b> Detailed scan acquisition parameters for functional magnetic resonance imaging sequences; ranges of acceptable parameters are given. TR=repitition time; TE=echo time; TI=inversion time. |                                                 |                                                 |                              |                              |
|-------------------------------------------------------------------------------------------------------------------------------------------------------------------------------------------------------------------------|-------------------------------------------------|-------------------------------------------------|------------------------------|------------------------------|
| <b>CAN-BIND Site</b>                                                                                                                                                                                                    | <b>Toronto Western/Toronto General Hospital</b> | <b>Centre for Addiction &amp; Mental Health</b> | <b>McMaster</b>              | <b>UCalgary</b>              |
| <b>CAN-BIND Project</b>                                                                                                                                                                                                 | CAN-BIND-1; CAN-BIND-2                          | CAN-BIND-1; CAN-BIND-2                          | CAN-BIND-1                   | CAN-BIND-1; CAN-BIND-3       |
| <b>Scanner Model</b>                                                                                                                                                                                                    | GE 3.0 Tesla Signa HDxt                         | GE 3.0 Tesla Discovery MR750                    | GE 3.0 Tesla Discovery MR750 | GE 3.0 Tesla Discovery MR750 |
| <b>Coil</b>                                                                                                                                                                                                             | GE 8HRBRAIN                                     | GE 8HRBRAIN                                     | GE 32Ch Head                 | GE HNS Head                  |
| <b>fMRI - Face Categorization Task/Emotional Conflict Resolution Task</b>                                                                                                                                               |                                                 |                                                 |                              |                              |
| TR (ms)                                                                                                                                                                                                                 | 2000.00                                         | 2000.00                                         | 2000.00                      | 2000.00                      |
| TE (ms)                                                                                                                                                                                                                 | 30.00                                           | 30.00                                           | 30.00                        | 30.00                        |
| FOV                                                                                                                                                                                                                     | 256                                             | 256                                             | 256                          | 256                          |
| Flip Angle (degree)                                                                                                                                                                                                     | 75.00                                           | 75.00                                           | 75.00                        | 75.00                        |
| Pixel Bandwidth                                                                                                                                                                                                         | 7812.50                                         | 7812.50                                         | 7812.50                      | 7812.50                      |
| Matrix Dimension (pixels)                                                                                                                                                                                               | 64 x 64                                         | 64 x 64                                         | 64 x 64                      | 64 x 64                      |
| Voxel Dimension (mm)                                                                                                                                                                                                    | 4 x 4 x 4                                       | 4 x 4 x 4                                       | 4 x 4 x 4                    | 4 x 4 x 4                    |
| Number of Volumes                                                                                                                                                                                                       | 202                                             | 202                                             | 202                          | 202                          |
| Number of slices                                                                                                                                                                                                        | 34                                              | 40                                              | 36                           | 36                           |
| Acquisition time (minutes)                                                                                                                                                                                              | 06:44                                           | 06:44                                           | 06:44                        | 06:44 <sup>1</sup>           |

**Appendix 1** to Hassel, S, MacQueen, G, Arnott, S et al. The Canadian Biomarker Integration Network in Depression (CAN-BIND) - Magnetic Resonance Imaging Protocols. *J Psychiatry Neurosci* 2019.

DOI: 10.1503/jpn.180036

© 2019 Joule Inc., or its licensors

*Online appendices are unedited and posted as supplied by the authors.*

| <b>fMRI - Affective Go-NoGo Task</b> |           |           |           |           |
|--------------------------------------|-----------|-----------|-----------|-----------|
| TR (ms)                              | 2000.00   | 2000.00   | 2000.00   | 2000.00   |
| TE (ms)                              | 30.00     | 30.00     | 30.00     | 30.00     |
| FOV                                  | 256       | 256       | 256       | 256       |
| Flip Angle (degree)                  | 75.00     | 75.00     | 75.00     | 75.00     |
| Pixel Bandwidth                      | 7812.50   | 7812.50   | 7812.50   | 7812.50   |
| Matrix Dimension (pixels)            | 64 x 64   | 64 x 64   | 64 x 64   | 64 x 64   |
| Voxel Dimension (mm)                 | 4 x 4 x 4 | 4 x 4 x 4 | 4 x 4 x 4 | 4 x 4 x 4 |
| Number of Volumes                    | 300       | 300       | 300       | 300       |
| Number of slices                     | 34        | 36        | 36        | 36        |
| Acquisition time (minutes)           | 10:00     | 10:00     | 10:00     | 10:00     |

**Appendix 1** to Hassel, S, MacQueen, G, Arnott, S et al. The Canadian Biomarker Integration Network in Depression (CAN-BIND) - Magnetic Resonance Imaging Protocols. *J Psychiatry Neurosci* 2019.

DOI: 10.1503/jpn.180036

© 2019 Joule Inc., or its licensors

*Online appendices are unedited and posted as supplied by the authors.*

| CAN-BIND Site                                                      | UBC                       | SunnyBrook            | Queens                             | Saint Michael's Hospital   |
|--------------------------------------------------------------------|---------------------------|-----------------------|------------------------------------|----------------------------|
| CAN-BIND Project                                                   | CAN-BIND-1; CAN-BIND-2    | CAN-BIND-3            | CAN-BIND-1; CAN-BIND-4; CAN-BIND-9 | CAN-BIND-5; CAN-BIND-10    |
| Scanner Model                                                      | Phillips 3.0 Tesla Intera | Phillips 3.0T Achieva | Siemens 3.0 Tesla TrioTim          | Siemens 3.0 Tesla Skyra    |
| Coil                                                               | SENSE-Head-8              | SENSE-Head-8          | 12-channel head matrix coil        | 20 channel Head/Neck coil. |
| fMRI - Face Categorization Task/Emotional Conflict Resolution Task |                           |                       |                                    |                            |
| TR (ms)                                                            | 2000.00                   | N/A                   | 2000.00                            | N/A                        |
| TE (ms)                                                            | 30.00                     | N/A                   | 25.00                              | N/A                        |
| FOV                                                                | 256                       | N/A                   | 1536 (mosaic)                      | N/A                        |
| Flip Angle (degree)                                                | 90.00                     | N/A                   | 75.00                              | N/A                        |
| Pixel Bandwidth                                                    | 4807.00                   | N/A                   | 2232.00                            | N/A                        |
| Matrix Dimension (pixels)                                          | 64 x 64                   | N/A                   | 64 x 64                            | N/A                        |
| Voxel Dimension (mm)                                               | 4 x 4 x 4                 | N/A                   | 4 x 4 x 4                          | N/A                        |
| Number of Volumes                                                  | 202                       | N/A                   | 202                                | N/A                        |
| Number of slices                                                   | 36                        | N/A                   | 40                                 | N/A                        |
| Acquisition time (minutes)                                         | 06:44                     | N/A                   | 06:44                              | N/A                        |
| fMRI - Affective Go-NoGo Task                                      |                           |                       |                                    |                            |
| TR (ms)                                                            | 2000.00                   | 2000.00               | 2000.00                            | N/A                        |
| TE (ms)                                                            | 30.00                     | 30.00                 | 30.00                              | N/A                        |

**Appendix 1** to Hassel, S, MacQueen, G, Arnott, S et al. The Canadian Biomarker Integration Network in Depression (CAN-BIND) - Magnetic Resonance Imaging Protocols. *J Psychiatry Neurosci* 2019.

DOI: 10.1503/jpn.180036

© 2019 Joule Inc., or its licensors

*Online appendices are unedited and posted as supplied by the authors.*

|                            |           |           |               |     |
|----------------------------|-----------|-----------|---------------|-----|
| FOV                        | 256       | 256       | 1536 (mosaic) | N/A |
| Flip Angle (degree)        | 75.00     | 75.00     | 75.00         | N/A |
| Pixel Bandwidth            | 4807.00   | 3589.00   | 4596.00       | N/A |
| Matrix Dimension (pixels)  | 64 x 64   | 64 x 64   | 64 x 64       | N/A |
| Voxel Dimension (mm)       | 4 x 4 x 4 | 4 x 4 x 4 | 4 x 4 x 4     | N/A |
| Number of Volumes          | 300       | 300       | 300           | N/A |
| Number of slices           | 36        | 36        | 36            | N/A |
| Acquisition time (minutes) | 10:06     | 10:06     | 10:08         |     |

**Appendix 1** to Hassel, S, MacQueen, G, Arnott, S et al. The Canadian Biomarker Integration Network in Depression (CAN-BIND) - Magnetic Resonance Imaging Protocols. *J Psychiatry Neurosci* 2019.

DOI: 10.1503/jpn.180036

© 2019 Joule Inc., or its licensors

*Online appendices are unedited and posted as supplied by the authors.*

| <b>Supplementary Table 2.</b> Detailed scan acquisition parameters for functional magnetic resonance imaging sequences; ranges of acceptable parameters are given. TR=repetition time; TE=echo time; TI=inversion time. |                                  |                                                  |                                                 |                              |                              |
|-------------------------------------------------------------------------------------------------------------------------------------------------------------------------------------------------------------------------|----------------------------------|--------------------------------------------------|-------------------------------------------------|------------------------------|------------------------------|
| CAN-BIND Site                                                                                                                                                                                                           | Saint Michael's Hospital         |                                                  |                                                 |                              | UCalgary                     |
| CAN-BIND Project                                                                                                                                                                                                        | CAN-BIND-5; CAN-BIND-10          |                                                  |                                                 |                              | CAN-BIND-3                   |
| Scanner Model                                                                                                                                                                                                           | Siemens 3.0 Tesla Skyra          |                                                  |                                                 |                              | GE 3.0 Tesla Discovery MR750 |
| Coil                                                                                                                                                                                                                    | 20 channel Head/Neck coil.       |                                                  |                                                 |                              | GE HNS Head                  |
| Software                                                                                                                                                                                                                | syngo MR E11                     |                                                  |                                                 |                              | DV25.0_R02_1549.b            |
| Task                                                                                                                                                                                                                    | fMRI - Probabilistic Reward Task | fMRI - Breathe Hold Challenge / Breath Hold Task | fMRI - Shifted Attention Emotion Appraisal Task | fMRI - Prediction Error Task | fMRI - Social Cognition Task |
| TR (ms)                                                                                                                                                                                                                 | 2000.00                          | 2000.00                                          | 2000.00                                         | 2000.00                      | 2.00                         |
| TE (ms)                                                                                                                                                                                                                 | 30.00                            | 30.00                                            | 30.00                                           | 30.00                        | 30.00                        |
| FoV                                                                                                                                                                                                                     | 256.00                           | 256.00                                           | 256.00                                          | 256.00                       | 256                          |
| Flip Angle (degree)                                                                                                                                                                                                     | 75.00                            | 75.00                                            | 75.00                                           | 75.00                        | 75.00                        |
| Pixel Bandwidth                                                                                                                                                                                                         | 3395.00                          | 3395.00                                          | 3395.00                                         | 3395.00                      | 7812.50                      |
| Matrix Dimension (pixels)                                                                                                                                                                                               | 64 x 64                          | 64 x 64                                          | 64 x 64                                         | 64 x 64                      | 64 x 64                      |
| Voxel Dimension (mm)                                                                                                                                                                                                    | 4 x 4 x 4                        | 4 x 4 x 4                                        | 4 x 4 x 4                                       | 4 x 4 x 4                    | 4 x 4 x 4                    |
| Number of Volumes                                                                                                                                                                                                       | 255 - 261                        | 316 - 323                                        | 178 - 182                                       | 429 - 457                    | 410.00                       |
| Number of slices                                                                                                                                                                                                        | 37.00                            | 37.00                                            | 37.00                                           | 37.00                        | 36.00                        |
| Acquisition times (minutes)                                                                                                                                                                                             | 13:28                            | 11:08                                            | 10:08                                           | 16:08                        | 14:00                        |

DOI: 10.1503/jpn.180036

© 2019 Joule Inc., or its licensors

*Online appendices are unedited and posted as supplied by the authors.*

### **Face Categorization Task/Emotional Conflict Resolution Task**

An emotional conflict-monitoring task was used to examine the extent to which affective information interferes with the processing of cognitive information. This task has been shown to activate fronto-limbic circuitry, associating amygdala, dorso-medial and dorso-lateral prefrontal cortices with the generation and monitoring of emotional conflict, and the anterior cingulate cortex during conflict resolution (e.g., [1-2]). In this task, happy or fearful faces are presented one at a time, superimposed on these faces are the words “HAPPY” or “FEAR”. In congruent trials, facial expression and word match; in incongruent trials, facial expression and word do not match. Equal numbers of congruent and incongruent trials are presented, and sex, identity and emotional expressions of faces were randomized to avoid repetitions of a combination. Participants were asked to identify the emotional expression displayed as quickly and accurately as possible.

### **Affective Go-NoGo Response Inhibition task**

We employed a modified version of an affective Go-NoGo paradigm. The emotional Go-NoGo task yields the same measure of inhibition as the typical Go-NoGo task, but the inclusion of affective stimuli also allows for the analysis of performance in response to cues of different emotional valences (e.g., happy versus sad) [3-4]). Thus, the task not only provides a measure of behavioural inhibition, but also of the emotional modulation of this inhibition [5]. During this modified affective Go-NoGo task, participants are presented with a square symbol or a circle symbol. They are instructed to press a response button every time a circle appears, and withhold their button press when a square appears. As the cues to respond are not related to the faces, the processing of facial emotion is taken to be implicit. If participants make a mistake (i.e., pressing a button for the square), the square turns red to remind them not to respond. When the participant correctly presses for a circle, the circle changes from black to gray. In the background there are mildly positive or angry faces. The onset of the face precedes the square or circle, and this onset time is jittered.

### **Incentive Delay task**

DOI: 10.1503/jpn.180036

© 2019 Joule Inc., or its licensors

*Online appendices are unedited and posted as supplied by the authors.*

In monetary incentive delay tasks, each trial presents a cue signaling potential monetary rewards, losses or no incentive, a delay anticipation period, then a target stimulus (to which participants respond with a speeded button press), followed by an outcome period during which hit/miss feedback and the associated reward/penalty are presented. Anticipating rewards, or losses, evokes increased arousal and attention; this is expected to elicit activity in brain regions associated with cognitive control and emotion–attention interactions [6], but may also elicit activation in brain regions related to processing the hedonic value of such stimuli, [7-8]. During this task, participants aim to press the response button during the time that a red square appears on the screen. The duration of the square is brief and adaptively titrated trial-by-trial so that participants are successful on about 50% of trials. If participants are successful it is scored as a ‘hit’; a late response is scored as a ‘miss’. Participants respond as quickly as possible upon seeing the red square, but if they respond too quickly (i.e., trying to anticipate the square) they also score a ‘miss’ and are informed that they have responded too early. Prior to each trial, an ‘incentive cue’ informs participants whether a hit will result in a gain (1\$), or in no payout (0\$ gain). Our version of the task did not include any ‘loss’ trials (i.e., playing to avoid penalties rather than earn rewards) – only reward or non-reward outcomes.

### **Working Memory Task**

The Working Memory task, specifically an N-back task, was chosen from the Human Connectome Project (<http://www.humanconnectomeproject.org>). This task has been associated with reliable brain activation across participants [9] and across time [10]. In this task, blocks of trials are presented showing pictures of faces, places, tools and body parts. Half of the blocks use a 2-back working memory task (respond ‘target’ whenever the current stimulus is the same as the one two places back), the other half use a 0-back working memory task (a target cue is presented at the start of each block, and the person responds ‘target’ to any presentation of that stimulus during the block). Cues indicate task type, for 0-back condition, the target is also identified, at the start of the block. The inclusion of lures is critical to ensure that the participants are using an active memory approach to the task and allows for assessment of conflict related activity as well as error related activity [11].

### **Social Cognition Task**

Social cognition is assessed using the Reading the Mind in the Eyes (RMET; [12]). RMET measures people’s capacity to discriminate the mental states of others by judging expressions displayed in 36 eye-regions of different faces and determining which of four descriptive words match best. A control condition requires the judgement of age (younger/older than 60 years) and gender (female

DOI: 10.1503/jpn.180036

© 2019 Joule Inc., or its licensors

*Online appendices are unedited and posted as supplied by the authors.*

/male), also using a four-option forced-choice condition, i.e., participants judge a face as young-female; old-female; young-male or old-male. The location of these options differs randomly across trials to minimize participants' automatic responses (i.e., without reading all options). Each block consists of 18 trials each. Blocks alternate between the mental state condition and the age-gender condition and are counterbalanced across participants within each group. Between trials, a fixation cross of varied duration (between 0.6s and 8s) will be presented. After fixation, facial stimuli are presented together with the four response options for 9s.

### **Prediction Error Task**

This task assesses expectation of reward. The measure of interest is brain activation in response to an unexpected outcome (i.e., a low-probability stimulus being rewarded). The task features two phases, learning and choosing, to dissociate potentially different neural circuits sub-serving learning reward associations and using them to guide behaviour [13]. In the learning phase, participants click a left or right button in response to a left or right visual cue, respectively. The cues remain on screen until a response is made. After a 1500ms delay, they will be given feedback about winning either \$.06 (safe trial with 100% contingency) or winning or losing \$0.12 (risky trial with 75% chance of reward and 25% chance of loss). The feedback will remain onscreen for 2000ms. The learning task consists of 120 trials, 60 of each cue type. During the choosing phase participants freely select one of the two cues presented during the learning phase, which sometimes results in winning money and sometimes not. The reward contingencies are the same, although participants are not informed about this. The choosing task consists of 120 trials. On each trial, both cues (as in the learning phase) will appear on the screen. When a choice is made with a button press, a black box will appear behind the chosen cue for 500ms to provide confirmation of the response. After a 1500ms delay, feedback will be presented for 2000ms.

### **Breath Hold Task**

This task evaluates group differences in brain activity associated with interoception. It allows exploration of whether the self-regulation neural network is a marker of suicide risk, as well as whether the task itself is a behavioural proxy for potential brain activity differences. This task measures cerebrovascular reactivity and is comprised of a series of breath hold challenges interspersed with paced breathing periods [14]. During each trial, participants engage in breath monitoring, visual monitoring and breath control. During breath monitoring participants report on their breathing by pressing a button for breath-in and a button for breath-out. In response to the button presses, a projection of a circle will expand and contract. Visual monitoring involves reporting on the circle, similar to that observed in breath monitoring, where participants will press a button for expansion or contraction. Finally, breath



**Appendix 1** to Hassel, S, MacQueen, G, Arnott, S et al. The Canadian Biomarker Integration Network in Depression (CAN-BIND) - Magnetic Resonance Imaging Protocols. *J Psychiatry Neurosci* 2019.

DOI: 10.1503/jpn.180036

© 2019 Joule Inc., or its licensors

*Online appendices are unedited and posted as supplied by the authors.*

control involves participants trying to match their breath to the movement of the circle; no button pressing is required. Three conditions are tested: speed similar to the participant's breath rate, faster than breath rate, and slower than breath rate. These will simulate excitation and relaxation.

### **Shifted Attention Emotion Appraisal (SEAT) Paradigm**

This task examines several levels of emotional processing: (1) implicit emotional processing, (2) attentional modulation of emotion, and (3) modulation of emotion by appraisal [15]. Stimuli are presented which belong to one of three categories: emotional pictures (i.e., facial expressions of emotions, specifically angry, fearful as well as neutral expressions), neutral pictures (i.e., buildings, indoor/outdoor scenes), or composite images (i.e., faces superimposed onto buildings). Images are presented once for each condition, with condition type presented in random order. Trials consist of a fixation cross, a condition cue, a blank screen, and lastly the composites or pictures. Participants then answer a binary question regarding the composite image (e.g., "Is the scene inside or outside", "Is the face male or female", etc.). Images of only faces and only places will be interspersed throughout the task [16].

### **Probabilistic Reward Task**

This task allows for the examination of reward sensitivity (i.e., how responsive an individual is to changing reward) and response bias (i.e., demonstrating preferential responding to rewarded stimuli) [17]. It consists of two blocks with an equal number of trials. During each trial, participants are presented with two side-by-side collections of squares or circles (500ms), after which participants must push a button indicating which collection has the most shapes. Participants are told at the beginning of the task that their goal is to win as much money as possible. However, participants do not know that an asymmetric reinforcer ratio is utilized in which monetary rewards are given three times more frequently for correctly identifying a particular stimulus (i.e., a "rich stimulus") than for correctly identifying a different stimulus (i.e., a "lean stimulus"). Participants will generally tend to exhibit response bias favouring the rich stimulus due to the monetary association.

### **References**

[1] Egner, T., Etkin, A., Gale, S., & Hirsch, J. (2008). Dissociable neural systems resolve conflict from emotional versus nonemotional distracters. *Cerebral Cortex (New York, N.Y. : 1991)*, 18(6), 1475–84.

**Appendix 1** to Hassel, S, MacQueen, G, Arnott, S et al. The Canadian Biomarker Integration Network in Depression (CAN-BIND) - Magnetic Resonance Imaging Protocols. *J Psychiatry Neurosci* 2019.

DOI: 10.1503/jpn.180036

© 2019 Joule Inc., or its licensors

*Online appendices are unedited and posted as supplied by the authors.*

[2] Etkin, A., Egner, T., Peraza, D. M., Kandel, E. R., & Hirsch, J. (2006). Resolving emotional conflict: a role for the rostral anterior cingulate cortex in modulating activity in the amygdala. *Neuron*, 51(6), 871–82.

[3] Schulz, K. P., Fan, J., Magidina, O., Marks, D. J., Hahn, B., & Halperin, J. M. (2007). Does the emotional go/no-go task really measure behavioral inhibition? Convergence with measures on a non-emotional analog. *Archives of Clinical Neuropsychology : The Official Journal of the National Academy of Neuropsychologists*, 22(2), 151–60.

[4] Schulz, K. P., Clerkin, S. M., Halperin, J. M., Newcorn, J. H., Tang, C. Y., & Fan, J. (2009). Dissociable neural effects of stimulus valence and preceding context during the inhibition of responses to emotional faces. *Human Brain Mapping*, 30(9), 2821–2833.

[5] Drevets, W. C., & Raichle, M. E. (1992). Neuroanatomical circuits in depression: implications for treatment mechanisms. *Psychopharmacology Bulletin*, 28(3), 261–74.

[6] Bush, G., Vogt, B. A., Holmes, J., Dale, A. M., Greve, D., Jenike, M. A., & Rosen, B. R. (2002). Dorsal anterior cingulate cortex: a role in reward-based decision making. *Proceedings of the National Academy of Sciences of the United States of America*, 99(1), 523–8.

[7] Kim, H., Shimojo, S., & O’Doherty, J. P. (2006). Is avoiding an aversive outcome rewarding? Neural substrates of avoidance learning in the human brain. *PLoS Biology*, 4(8), e233.

**Appendix 1** to Hassel, S, MacQueen, G, Arnott, S et al. The Canadian Biomarker Integration Network in Depression (CAN-BIND) - Magnetic Resonance Imaging Protocols. *J Psychiatry Neurosci* 2019.

DOI: 10.1503/jpn.180036

© 2019 Joule Inc., or its licensors

*Online appendices are unedited and posted as supplied by the authors.*

[8] Dillon DG, Holmes AJ, Jahn AL, Bogdan R, Wald LL, Pizzagalli DA. Dissociation of neural regions associated with anticipatory versus consummatory phases of incentive processing. *Psychophysiology*. 2008 Jan;45(1):36-49. Epub 2007 Sep 10.

[9] Drobyshevsky, A., Baumann, S. B., & Schneider, W. (2006). A rapid fMRI task battery for mapping of visual, motor, cognitive, and emotional function. *NeuroImage*, 31(2), 732–44.

[10] Caceres, A., Hall, D. L., Zelaya, F. O., Williams, S. C. R., & Mehta, M. A. (2009). Measuring fMRI reliability with the intra-class correlation coefficient. *NeuroImage*, 45(3), 758–68.

[11] Barch, D. M., Burgess, G. C., Harms, M. P., Petersen, S. E., Schlaggar, B. L., Corbetta, M., ... WU-Minn HCP Consortium. (2013). Function in the human connectome: task-fMRI and individual differences in behavior. *NeuroImage*, 80, 169–89.

[12] Baron-Cohen S, Wheelwright S, Hill J, Raste Y, Plumb I The Reading the Mind in the Eyes test revised version: a study with normal adults and adults with Asperger syndrome or high-functioning autism. *J Child Psychol Psychiatry* 2001; 42:241-251

[13] Cohen, M., Axmacher, N., Lenartz, D., Elger, C., Sturm, V., Schlaepfer, T. (2009) Neuroelectric Signatures of Reward Learning and Decision-Making in the Human Nucleus Accumbens. *Neuropsychopharmacology*, 34222, 1649-1658

[14] Farb, N., Segal, Z. & Anderson, A. (2013) Mindfulness meditation training alters cortical representations of interoceptive attention. *Soc Cogn Affect Neurosci* 8, 15–26.

**Appendix 1** to Hassel, S, MacQueen, G, Arnott, S et al. The Canadian Biomarker Integration Network in Depression (CAN-BIND) - Magnetic Resonance Imaging Protocols. *J Psychiatry Neurosci* 2019.

DOI: 10.1503/jpn.180036

© 2019 Joule Inc., or its licensors

*Online appendices are unedited and posted as supplied by the authors.*

[15] Sripada, R.K., Marx, C.E., King, A.P., Rampton, J.C., Ho, S.S., Liberzon, I. (2013a) Allopregnanolone elevations following pregnenolone administration are associated with enhanced activation of emotion regulation neurocircuits. *Biol Psychiatry*. 73(11):1045-53.

[16] Sripada, R., Marx, C., King, A., Rajaram, N., Garfinkel, S., Abelson, J., Liberzon, I. (2013b) DHEA Enhances Emotion Regulation Neurocircuits and Modulates Memory for Emotional Stimuli. *Neuropsychopharmacology*, 38, 1798-1807.

[17] Pizzagalli, D. A., Iosifescu, D., Hallett, L. A., Ratner, K. G. & Fava, M. (2008) Reduced hedonic capacity in major depressive disorder: Evidence from a probabilistic reward task. *J Psychiatr Res* 43, 76–87.
